# Supplementary material for: Coordination of sorbitol to Ga(OTf)3 in the liquid phase: an experimental and theoretical study
Source: Royal Society of Chemistry journal article supplement (doi:10.1039/d3cp00141e), 2023-01-01
Supplement: d3cp00141e2.pdf [file d3cp00141e2.pdf]

## Electronic Supplementary Information

### Coordination of Sorbitol to Ga(OTf)<sub>3</sub> in Liquid Phase: An Experimental and Theoretical Study

Mei Li<sup>a</sup>, Jin-Shan Xiong<sup>a</sup>, Han-Yun Min<sup>a</sup>, Ye-Xin Hu<sup>b</sup>, Liang-Fang Zhu<sup>b</sup>, Chang-Wei Hu<sup>b</sup>,  
Hua-Qing Yang<sup>a\*</sup>

<sup>a</sup>College of Chemical Engineering, Sichuan University, Chengdu, Sichuan, 610065, P.R. China

<sup>b</sup>Key Laboratory of Green Chemistry and Technology, Ministry of Education, College of Chemistry, Sichuan University, Chengdu, Sichuan, 610064, P.R. China

*Phys. Chem. Chem. Phys.*

\*Correspondence to:

H.-Q. Yang; e-mail: [huaqingyang@scu.edu.cn](mailto:huaqingyang@scu.edu.cn);

Fax: 86 28 85464466;

Telephone: 86 28 85464466

## Content

- i. **Figure S1.** The geometric structures and the relative Gibbs free energies ( $G_r$ , kJ mol<sup>-1</sup>) relative to SBT-I-1 for fifteen conformers of sorbitol in liquid solution calculated at the 6-311++g(d,p) level in sorbitol solution under 433.15K and ambient pressure (433.15 K and 1.0 atm). For clarity, hydrogen atoms on carbon are not shown. Bond lengths are reported in Å.....1
- ii. **Figure S2.** Optimized geometric structures and the Gibbs free energies of formation ( $\Delta G_s$ ) and the coordinated patterns of Ga<sup>3+</sup> cation with OTf<sup>-</sup> for [Ga(OTf)<sub>n</sub>]<sup>3-n</sup> ( $n=1\sim 3$ ) species in the sorbitol solution. For clarity, hydrogen atoms on carbon are not shown. Bond lengths are reported in Å. ....2
- iii. **Figure S3.** optimized geometric structures and the Gibbs free energies of formation ( $\Delta G_s$ , kJ mol<sup>-1</sup>) of [Ga(SBT)]<sup>3+</sup> complex in the sorbitol solution. For clarity, hydrogen atoms on carbon are not shown. Bond lengths are reported in Å.....3
- iv. **Figure S4.** Optimized geometric structures and the Gibbs free energies of formation ( $\Delta G_s$ , kJ mol<sup>-1</sup>) of [Ga(SBT)<sub>2</sub>]<sup>3+</sup> in the sorbitol solution. (a) four-coordination [Ga(SBT)<sub>2</sub>]<sup>3+</sup> complexes; (b) five-coordination [Ga(SBT)<sub>2</sub>]<sup>3+</sup> complexes; (c) six-coordination [Ga(SBT)<sub>2</sub>]<sup>3+</sup> complexes. For clarity, hydrogen atoms on carbon are not shown. Bond lengths are reported in Å. ....5
- v. **Table S1.** Zero-point energies ( $ZPE$ , hartree), thermal correction to Gibbs free energy ( $G_0$ , hartree), total energies ( $E_c$ , hartree) corrected by  $ZPE$ , sum of electronic and thermal free energies ( $G_c$ , hartree) with  $ZPE$  and thermal corrections, and relative energies ( $E_r$ , kJ mol<sup>-1</sup>) and relative Gibbs free energies ( $G_r$ , kJ mol<sup>-1</sup>) relative to SBT-I-1 for fifteen conformers of sorbitol at M06/6-311++G(d,p) level in sorbitol solution. ....6
- vi. **Table S2.** Zero-point energies ( $ZPE$ , hartree), thermal correction to Gibbs free energy ( $G_0$ , hartree), total energies ( $E_c$ , hartree) corrected by  $ZPE$ , sum of electronic and thermal free energies ( $G_c$ , hartree) with  $ZPE$  and thermal corrections, and relative energies ( $E_r$ , kJ mol<sup>-1</sup>) and relative Gibbs free energies ( $G_r$ , kJ mol<sup>-1</sup>) relative to Ga<sup>3+</sup> and OTf<sup>-</sup> for [Ga(OTf)<sub>n</sub>]<sup>3-n</sup> ( $n= 1, 2, 3$ ) at M06/6-311++G(d,p) level in sorbitol solution. ....7
- vii. **Table S3.** Zero-point energies ( $ZPE$ , hartree), thermal correction to Gibbs free energy ( $G_0$ , hartree), total energies ( $E_c$ , hartree) corrected by  $ZPE$ , sum of electronic and thermal free energies ( $G_c$ , hartree) with  $ZPE$  and thermal corrections, and relative energies ( $E_r$ , kJ mol<sup>-1</sup>) and relative Gibbs free energies ( $G_r$ , kJ mol<sup>-1</sup>) relative to Ga<sup>3+</sup> and SBT for [Ga(SBT)<sub>m</sub>]<sup>3+</sup> ( $m= 1, 2$ ) at M06/6-311++G(d,p) level in sorbitol solution. ....8
- viii. **Table S4.** Zero-point energies ( $ZPE$ , hartree), thermal correction to Gibbs free energy ( $G_0$ , hartree), total energies ( $E_c$ , hartree) corrected by  $ZPE$ , sum of electronic and thermal free energies ( $G_c$ , hartree) with  $ZPE$  and thermal corrections, and relative energies ( $E_r$ , kJ mol<sup>-1</sup>) and relative Gibbs free energies ( $G_r$ , kJ mol<sup>-1</sup>) relative to Ga<sup>3+</sup>, SBT and OTf<sup>-</sup> for [Ga(OTf)<sub>n</sub>(SBT)<sub>m</sub>]<sup>3-n</sup> ( $n = 1,2; m = 1, 2$ ) at M06/6-311++G(d,p) level in sorbitol solution. ....10
- ix. **Table S5.** In THF solution with both SBT and Ga(OTf)<sub>3</sub> compounds, the species was characterized by ESI-MS spectra.<sup>a</sup> .....11
- x. **Table S6.** Some typical species from experimental observation of ESI-MS spectra and the density functional theory (DFT) calculations at the M06/6-311++g(d,p), aug-cc-pvtz level..12

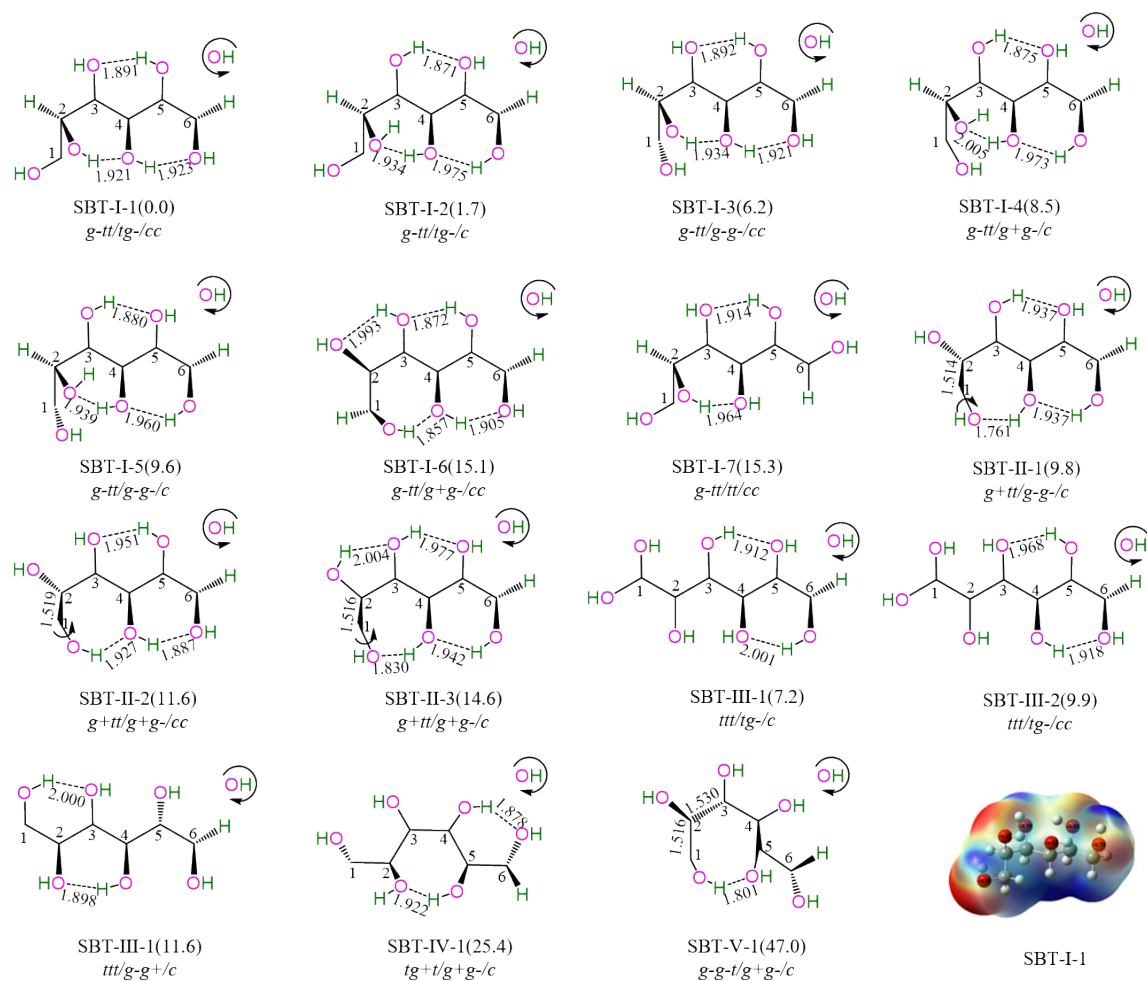

**Figure S1.** The geometric structures and the relative Gibbs free energies ( $G_r$ ,  $\text{kJ mol}^{-1}$ ) relative to SBT-I-1 for fifteen conformers of sorbitol in liquid solution calculated at the 6-311++g(d,p) level in sorbitol solution under 433.15K and ambient pressure (433.15 K and 1.0 atm). For clarity, hydrogen atoms on carbon are not shown. Bond lengths are reported in Å.

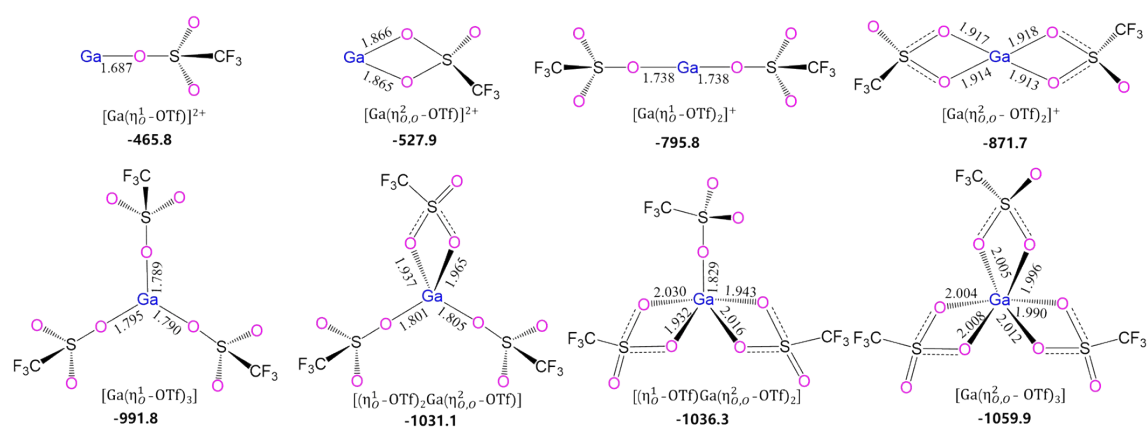

**Figure S2.** Optimized geometric structures and the Gibbs free energies of formation ( $\Delta G_s$ ) and the coordinated patterns of Ga<sup>3+</sup> cation with OTf<sup>-</sup> for  $[\text{Ga}(\text{OTf})_n]^{3-n}$  ( $n=1-3$ ) species in the sorbitol solution. For clarity, hydrogen atoms on carbon are not shown. Bond lengths are reported in Å.

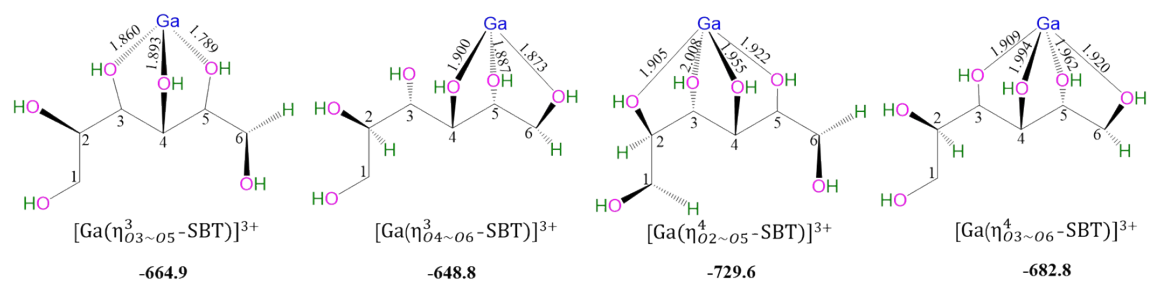

**Figure S3.** optimized geometric structures and the Gibbs free energies of formation ( $\Delta G_f$ ,  $\text{kJ mol}^{-1}$ ) of  $[Ga(\text{SBT})]^{3+}$  complex in the sorbitol solution. For clarity, hydrogen atoms on carbon are not shown. Bond lengths are reported in Å.

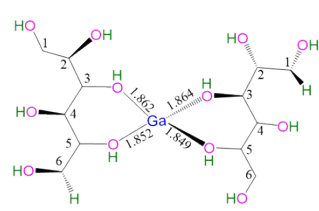

$[\text{Ga}(\eta^2_{\text{O}3,05}\text{-SBT})_2]^{3+}$   
-909.6

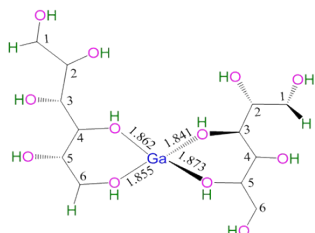

$[(\eta^2_{\text{O}3,05}\text{-SBT})\text{Ga}(\eta^2_{\text{O}4,06}\text{-SBT})]^{3+}$   
-893.7

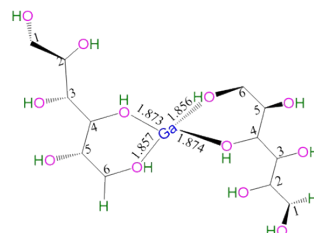

$[\text{Ga}(\eta^2_{\text{O}4,06}\text{-SBT})_2]^{3+}$   
-862.7

(a)

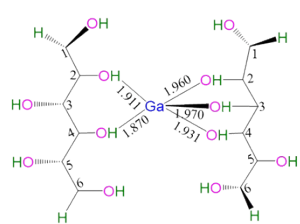

$[(\eta^2_{\text{O}2,04}\text{-SBT})\text{Ga}(\eta^3_{\text{O}2\sim 04}\text{-SBT})]^{3+}$   
-980.7

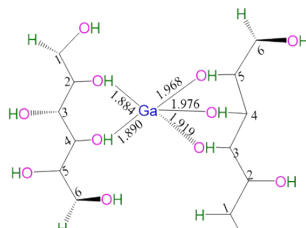

$[(\eta^2_{\text{O}2,04}\text{-SBT})\text{Ga}(\eta^3_{\text{O}3\sim 05}\text{-SBT})]^{3+}$   
-986.4

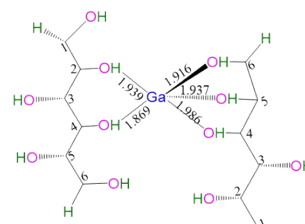

$[(\eta^2_{\text{O}2,04}\text{-SBT})\text{Ga}(\eta^3_{\text{O}4\sim 06}\text{-SBT})]^{3+}$   
-955.5

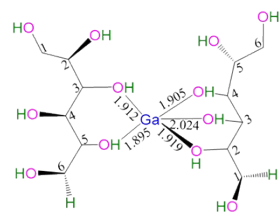

$[(\eta^2_{\text{O}3,05}\text{-SBT})\text{Ga}(\eta^3_{\text{O}2\sim 04}\text{-SBT})]^{3+}$   
-980.6

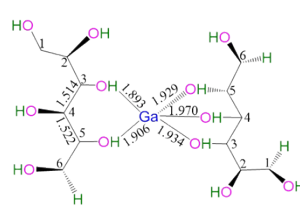

$[(\eta^2_{\text{O}3,05}\text{-SBT})\text{Ga}(\eta^3_{\text{O}3\sim 05}\text{-SBT})]^{3+}$   
-968.7

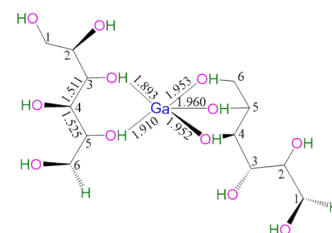

$[(\eta^2_{\text{O}3,05}\text{-SBT})\text{Ga}(\eta^3_{\text{O}4\sim 06}\text{-SBT})]^{3+}$   
-946.6

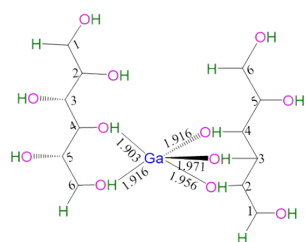

$[(\eta^2_{\text{O}4,06}\text{-SBT})\text{Ga}(\eta^3_{\text{O}2\sim 04}\text{-SBT})]^{3+}$   
-961.2

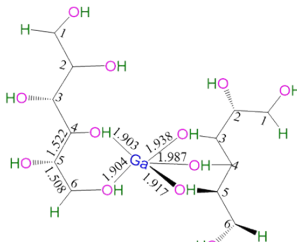

$[(\eta^2_{\text{O}4,06}\text{-SBT})\text{Ga}(\eta^3_{\text{O}3\sim 05}\text{-SBT})]^{3+}$   
-956.4

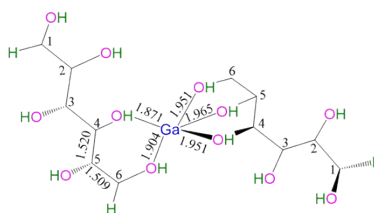

$[(\eta^2_{\text{O}4,06}\text{-SBT})\text{Ga}(\eta^3_{\text{O}4\sim 06}\text{-SBT})]^{3+}$   
-979.6

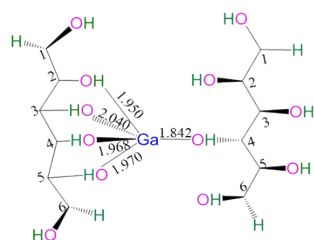

$[(\eta^4_{\text{O}2\sim 05}\text{-SBT})\text{Ga}(\eta^1_{\text{O}4}\text{-SBT})]^{3+}$   
-895.2

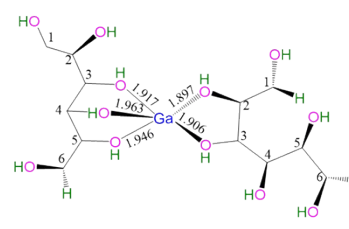

$[(\eta^3_{\text{O}3\sim 05}\text{-SBT})\text{Ga}(\eta^2_{\text{O}2,03}\text{-SBT})]^{3+}$   
-957.6

(b)

Continued from Fig.S4

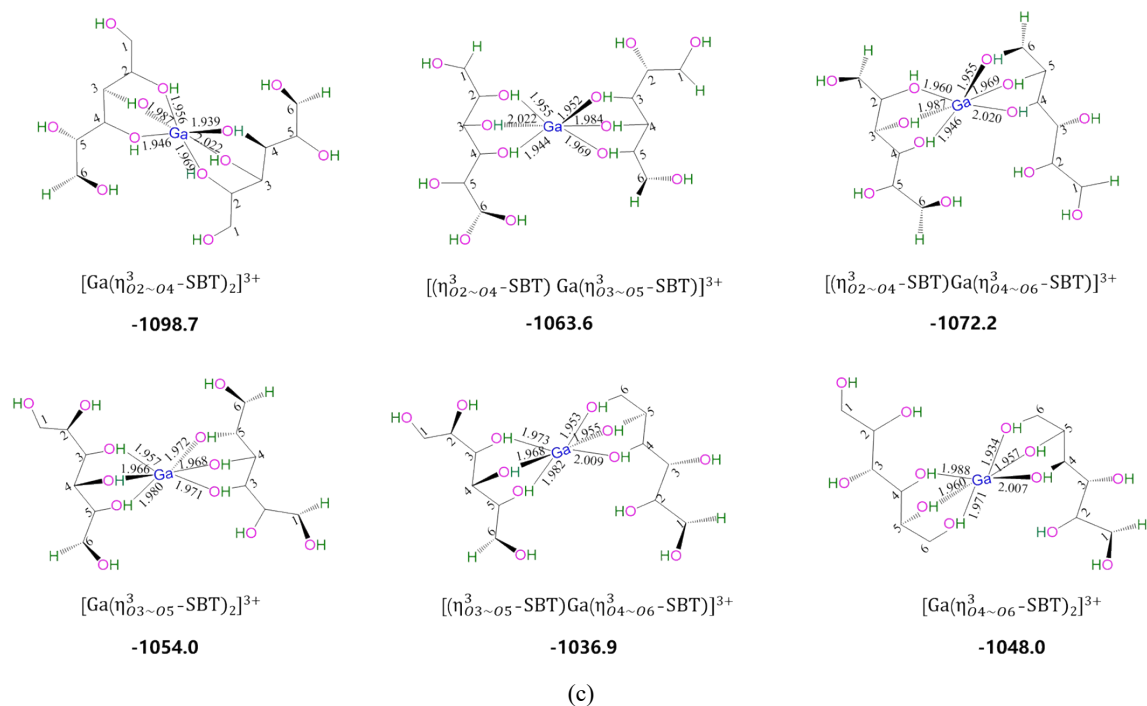

**Figure S4.** Optimized geometric structures and the Gibbs free energies of formation ( $\Delta G_s$ ,  $\text{kJ mol}^{-1}$ ) of  $[\text{Ga}(\text{SBT})_2]^{3+}$  in the sorbitol solution. (a) four-coordination  $[\text{Ga}(\text{SBT})_2]^{3+}$  complexes; (b) five-coordination  $[\text{Ga}(\text{SBT})_2]^{3+}$  complexes; (c) six-coordination  $[\text{Ga}(\text{SBT})_2]^{3+}$  complexes. For clarity, hydrogen atoms on carbon are not shown. Bond lengths are reported in Å.

**Table S1.** Zero-point energies ( $ZPE$ , hartree), thermal correction to Gibbs free energy ( $G_0$ , hartree), total energies ( $E_c$ , hartree) corrected by  $ZPE$ , sum of electronic and thermal free energies ( $G_c$ , hartree) with  $ZPE$  and thermal corrections, and relative energies ( $E_r$ ,  $\text{kJ mol}^{-1}$ ) and relative Gibbs free energies ( $G_r$ ,  $\text{kJ mol}^{-1}$ ) relative to SBT-I-1 for fifteen conformers of sorbitol at M06/6-311++G(d,p) level in sorbitol solution.

| Species   | $ZPE$   | $E_c$      | $G_0$   | $G_c$      | $E_r$ | $G_r$ |
|-----------|---------|------------|---------|------------|-------|-------|
| SBT-I-1   | 0.21938 | -688.03746 | 0.15320 | -688.10365 | 0.0   | 0.0   |
| SBT-I-2   | 0.21936 | -688.03765 | 0.15400 | -688.10301 | 0.5   | 1.7   |
| SBT-I-3   | 0.21936 | -688.03546 | 0.15355 | -688.10127 | 5.3   | 6.2   |
| SBT-I-4   | 0.21985 | -688.03570 | 0.15512 | -688.10043 | 4.6   | 8.5   |
| SBT-I-5   | 0.21970 | -688.03479 | 0.15448 | -688.10000 | 7.0   | 9.6   |
| SBT-I-6   | 0.22077 | -688.03425 | 0.15712 | -688.09791 | 8.4   | 15.1  |
| SBT-I-7   | 0.21804 | -688.03069 | 0.15090 | -688.09783 | 17.8  | 15.3  |
| SBT-II-1  | 0.21908 | -688.00718 | 0.15256 | -688.09993 | 79.5  | 9.8   |
| SBT-II-2  | 0.22018 | -688.03439 | 0.15535 | -688.09921 | 8.1   | 11.6  |
| SBT-II-3  | 0.22030 | -688.03407 | 0.15628 | -688.09809 | 8.9   | 14.6  |
| SBT-III-1 | 0.21750 | -688.03291 | 0.14949 | -688.10092 | 11.9  | 7.2   |
| SBT-III-2 | 0.21869 | -688.03326 | 0.15205 | -688.09990 | 11.0  | 9.9   |
| SBT-III-3 | 0.21757 | -688.03059 | 0.14892 | -688.09924 | 18.0  | 11.6  |
| SBT-IV-1  | 0.21800 | -688.02654 | 0.15058 | -688.09396 | 28.7  | 25.4  |
| SBT-V-1   | 0.21924 | -688.02106 | 0.15453 | -688.08576 | 43.1  | 47.0  |



**Table S2.** Zero-point energies (*ZPE*, hartree), thermal correction to Gibbs free energy ( $G_0$ , hartree), total energies ( $E_c$ , hartree) corrected by *ZPE*, sum of electronic and thermal free energies ( $G_c$ , hartree) with *ZPE* and thermal corrections, and relative energies ( $E_r$ , kJ mol<sup>-1</sup>) and relative Gibbs free energies ( $G_r$ , kJ mol<sup>-1</sup>) relative to Ga<sup>3+</sup> and OTf<sup>-</sup> for [Ga(OTf)<sub>n</sub>]<sup>3-n</sup> ( $n = 1, 2, 3$ ) at M06/6-311++G(d,p) level in sorbitol solution.

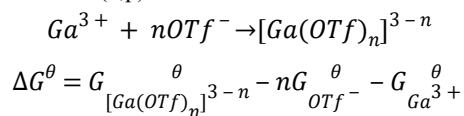

| Species                                                                                                 | <i>ZPE</i> | $E_c$       | $G_0$    | $G_c$       | $E_r$   | $G_r$   |
|---------------------------------------------------------------------------------------------------------|------------|-------------|----------|-------------|---------|---------|
| OTf <sup>-</sup>                                                                                        | 0.02747    | -961.53419  | -0.02407 | -961.58573  |         |         |
| Ga <sup>3+</sup>                                                                                        | 0.00000    | -1923.94153 | -0.02450 | -1923.96603 | 0.0     | 0.0     |
| [Ga( <sup>1</sup> $\eta_{o-o}$ -OTf)] <sup>2+</sup>                                                     | 0.02852    | -2885.67096 | -0.02970 | -2885.72918 |         |         |
| [Ga( <sup>1</sup> $\eta_{o-o}$ -OTf)] <sup>2+</sup> - OTf <sup>-</sup>                                  | 0.00105    | -1924.13677 | -0.00563 | -1924.14345 | -512.6  | -465.8  |
| [Ga( <sup>2</sup> $\eta_{o,o}$ -OTf)] <sup>2+</sup>                                                     | 0.02867    | -2885.69505 | -0.02911 | -2885.75283 |         |         |
| [Ga( <sup>2</sup> $\eta_{o,o}$ -OTf)] <sup>2+</sup> - OTf <sup>-</sup>                                  | 0.00120    | -1924.16086 | -0.00504 | -1924.16710 | -575.9  | -527.9  |
| [Ga( <sup>1</sup> $\eta_{o-o}$ -OTf) <sub>2</sub> ] <sup>+</sup>                                        | 0.05857    | -3847.35874 | -0.02328 | -3847.44059 |         |         |
| [Ga( <sup>1</sup> $\eta_{o-o}$ -OTf) <sub>2</sub> ] <sup>+</sup> - 2*OTf <sup>-</sup>                   | 0.00363    | -1924.29036 | 0.02486  | -1924.26912 | -915.8  | -795.8  |
| [Ga( <sup>2</sup> $\eta_{o,o}$ -OTf) <sub>2</sub> ] <sup>+</sup>                                        | 0.05866    | -3847.38914 | -0.02171 | -3847.46950 |         |         |
| [Ga( <sup>2</sup> $\eta_{o,o}$ -OTf) <sub>2</sub> ] <sup>2+</sup> - 2*OTf <sup>-</sup>                  | 0.00372    | -1924.32076 | 0.02644  | -1924.29803 | -995.7  | -871.7  |
| Ga( <sup>1</sup> $\eta_{o-o}$ -OTf) <sub>3</sub>                                                        | 0.08872    | -4808.99900 | -0.01329 | -4809.10100 |         |         |
| Ga( <sup>1</sup> $\eta_{o-o}$ -OTf) <sub>3</sub> - 3*OTf <sup>-</sup>                                   | 0.00630    | -1924.39643 | 0.05893  | -1924.34380 | 1194.3  | -991.8  |
| ( <sup>1</sup> $\eta_{o-o}$ -OTf) <sub>2</sub> Ga( <sup>2</sup> $\eta_{o,o}$ -OTf)                      | 0.08861    | -4809.01431 | -0.01303 | -4809.11595 |         |         |
| ( <sup>1</sup> $\eta_{o-o}$ -OTf) <sub>2</sub> Ga( <sup>2</sup> $\eta_{o,o}$ -OTf) - 3*OTf <sup>-</sup> | 0.00620    | -1924.41174 | 0.05919  | -1924.35875 | -1234.5 | -1031.1 |
| ( <sup>1</sup> $\eta_{o-o}$ -OTf)Ga( <sup>2</sup> $\eta_{o,o}$ -OTf) <sub>2</sub>                       | 0.08924    | -4809.02160 | -0.00709 | -4809.11794 |         |         |
| ( <sup>1</sup> $\eta_{o-o}$ -OTf)Ga( <sup>2</sup> $\eta_{o,o}$ -OTf) <sub>2</sub> - 3*OTf <sup>-</sup>  | 0.00683    | -1924.41903 | 0.06513  | -1924.36074 | -1253.7 | -1036.3 |
| Ga( <sup>2</sup> $\eta_{o,o}$ -OTf) <sub>3</sub>                                                        | 0.08872    | -4809.02804 | -0.01016 | -4809.12692 |         |         |
| Ga( <sup>2</sup> $\eta_{o,o}$ -OTf) <sub>3</sub> - 3*OTf <sup>-</sup>                                   | 0.00630    | -1924.42547 | 0.06206  | -1924.36972 | -1270.6 | -1059.9 |

**Table S3.** Zero-point energies (*ZPE*, hartree), thermal correction to Gibbs free energy ( $G_0$ , hartree), total energies ( $E_c$ , hartree) corrected by *ZPE*, sum of electronic and thermal free energies ( $G_c$ , hartree) with *ZPE* and thermal corrections, and relative energies ( $E_r$ , kJ mol<sup>-1</sup>) and relative Gibbs free energies ( $G_r$ , kJ mol<sup>-1</sup>) relative to Ga<sup>3+</sup> and SBT for [Ga(SBT)<sub>m</sub>]<sup>3+</sup> ( $m = 1, 2$ ) at M06/6-311++G(d,p) level in sorbitol solution.

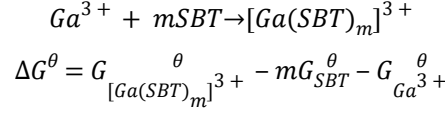

| Species                                                                                                  | <i>ZPE</i> | $E_c$       | $G_0$    | $G_c$       | $E_r$   | $G_r$  |
|----------------------------------------------------------------------------------------------------------|------------|-------------|----------|-------------|---------|--------|
| SBT                                                                                                      | 0.21938    | -688.03746  | 0.15320  | -688.10365  |         |        |
| Ga <sup>3+</sup>                                                                                         | 0.00000    | -1923.94153 | -0.02450 | -1923.96603 | 0.0     | 0.0    |
| [ <sup>3</sup> η <sub>03~05</sub> -SBT)Ga] <sup>3+</sup>                                                 | 0.21872    | -2612.25432 | 0.15012  | -2612.32293 |         |        |
| [ <sup>3</sup> η <sub>03~05</sub> -SBT)Ga] <sup>3+</sup> - SBT                                           | -0.00066   | -1924.21686 | -0.00308 | -1924.21928 | -722.9  | -664.9 |
| [ <sup>3</sup> η <sub>04~06</sub> -SBT)Ga] <sup>3+</sup>                                                 | 0.21985    | -2612.24951 | 0.15257  | -2612.31679 |         |        |
| [ <sup>3</sup> η <sub>04~06</sub> -SBT)Ga] <sup>3+</sup> - SBT                                           | 0.00047    | -1924.21204 | -0.00063 | -1924.21314 | -710.2  | -648.8 |
| [ <sup>4</sup> η <sub>02~05</sub> -SBT)Ga] <sup>3+</sup>                                                 | 0.22010    | -2612.28170 | 0.15421  | -2612.34758 |         |        |
| [ <sup>4</sup> η <sub>02~05</sub> -SBT)Ga] <sup>3+</sup> - SBT                                           | 0.00071    | -1924.24423 | 0.00101  | -1924.24393 | -794.7  | -729.6 |
| [ <sup>4</sup> η <sub>03~06</sub> -SBT)Ga] <sup>3+</sup>                                                 | 0.22099    | -2612.26406 | 0.15532  | -2612.32973 |         |        |
| [ <sup>4</sup> η <sub>03~06</sub> -SBT)Ga] <sup>3+</sup> - SBT                                           | 0.00160    | -1924.22659 | 0.00212  | -1924.22608 | -748.4  | -682.8 |
| [Ga( <sup>2</sup> η <sub>03,05</sub> -SBT) <sub>2</sub> ] <sup>3+</sup>                                  | 0.44050    | -3300.41595 | 0.33666  | -3300.51979 |         |        |
| [Ga( <sup>2</sup> η <sub>03,05</sub> -SBT) <sub>2</sub> ] <sup>3+</sup> - 2*SBT                          | 0.00173    | -1924.34102 | 0.03027  | -1924.31249 | -1048.9 | -909.6 |
| [( <sup>2</sup> η <sub>03,05</sub> -SBT)Ga( <sup>2</sup> η <sub>04,06</sub> -SBT)] <sup>3+</sup>         | 0.43955    | -3300.40844 | 0.33425  | -3300.51374 |         |        |
| [( <sup>2</sup> η <sub>03,05</sub> -SBT)Ga( <sup>2</sup> η <sub>04,06</sub> -SBT)] <sup>3+</sup> - 2*SBT | 0.00078    | -1924.33351 | 0.02786  | -1924.30644 | -1029.2 | -893.7 |
| [Ga( <sup>2</sup> η <sub>04,06</sub> -SBT) <sub>2</sub> ] <sup>3+</sup>                                  | 0.44023    | -3300.39986 | 0.33818  | -3300.50192 |         |        |
| [Ga( <sup>2</sup> η <sub>04,06</sub> -SBT) <sub>2</sub> ] <sup>3+</sup> - 2*SBT                          | 0.00146    | -1924.32494 | 0.03178  | -1924.29462 | -1006.6 | -862.7 |
| [( <sup>2</sup> η <sub>02,04</sub> -SBT)Ga( <sup>3</sup> η <sub>02~04</sub> -SBT)] <sup>3+</sup>         | 0.44332    | -3300.44920 | 0.34567  | -3300.54685 |         |        |
| [( <sup>2</sup> η <sub>02,04</sub> -SBT)Ga( <sup>3</sup> η <sub>02~04</sub> -SBT)] <sup>3+</sup> - 2*SBT | 0.00455    | -1924.37427 | 0.03927  | -1924.33955 | -1136.2 | -980.7 |
| [( <sup>2</sup> η <sub>02,04</sub> -SBT)Ga( <sup>3</sup> η <sub>03~05</sub> -SBT)] <sup>3+</sup>         | 0.44207    | -3300.44801 | 0.34105  | -3300.54903 |         |        |
| [( <sup>2</sup> η <sub>02,04</sub> -SBT)Ga( <sup>3</sup> η <sub>03~05</sub> -SBT)] <sup>3+</sup> - 2*SBT | 0.00331    | -1924.37308 | 0.03465  | -1924.34173 | -1133.0 | -986.4 |
| [ <sup>2</sup> η <sub>02,04</sub> -SBT)Ga( <sup>3</sup> η <sub>04~06</sub> -SBT)] <sup>3+</sup>          | 0.44235    | -3300.43659 | 0.34167  | -3300.53726 |         |        |
| [ <sup>2</sup> η <sub>02,04</sub> -SBT)Ga( <sup>3</sup> η <sub>04~06</sub> -SBT)] <sup>3+</sup> - 2*SBT  | 0.00358    | -1924.36166 | 0.03527  | -1924.32996 | -1103.0 | -955.5 |
| [( <sup>2</sup> η <sub>03,05</sub> -SBT)Ga( <sup>3</sup> η <sub>02~04</sub> -SBT)] <sup>3+</sup>         | 0.44158    | -3300.44409 | 0.33885  | -3300.54682 |         |        |
| [( <sup>2</sup> η <sub>03,05</sub> -SBT)Ga( <sup>3</sup> η <sub>02~04</sub> -SBT)] <sup>3+</sup> - 2*SBT | 0.00282    | -1924.36916 | 0.03245  | -1924.33952 | -1122.7 | -980.6 |
| [( <sup>2</sup> η <sub>03,05</sub> -SBT)Ga( <sup>3</sup> η <sub>03~05</sub> -SBT)] <sup>3+</sup>         | 0.44165    | -3300.44038 | 0.33972  | -3300.54230 |         |        |
| [( <sup>2</sup> η <sub>03,05</sub> -SBT)Ga( <sup>3</sup> η <sub>03~05</sub> -SBT)] <sup>3+</sup> - 2*SBT | 0.00288    | -1924.36545 | 0.03332  | -1924.33500 | -1113.0 | -968.7 |
| [ <sup>2</sup> η <sub>03,05</sub> -SBT)Ga( <sup>3</sup> η <sub>04~06</sub> -SBT)] <sup>3+</sup>          | 0.44315    | -3300.43467 | 0.34394  | -3300.53388 |         |        |

|                                                                |         |             |         |             |         |        |
|----------------------------------------------------------------|---------|-------------|---------|-------------|---------|--------|
| $SBT)^{3+}$                                                    |         |             |         |             |         |        |
| $[(\eta_{03,05}^2-SBT)Ga(\eta_{04\sim06}^3-SBT)]^{3+} - 2*SBT$ | 0.00438 | -1924.35974 | 0.03754 | -1924.32658 | -1098.0 | -946.6 |
| $[(\eta_{04,06}^2-SBT)Ga(\eta_{02\sim04}^3-SBT)]^{3+}$         | 0.44139 | -3300.43824 | 0.33946 | -3300.54017 |         |        |
| $[(\eta_{04,06}^2-SBT)Ga(\eta_{02\sim04}^3-SBT)]^{3+} - 2*SBT$ | 0.00262 | -1924.36331 | 0.03306 | -1924.33287 | -1107.4 | -963.1 |

Continued from Table S3

| Species                                                            | ZPE     | $E_c$       | $G_0$   | $G_c$       | $E_r$   | $G_r$   |
|--------------------------------------------------------------------|---------|-------------|---------|-------------|---------|---------|
| $[(\eta_{04,06}^2-SBT)Ga(\eta_{03\sim05}^3-SBT)]^{3+}$             | 0.44130 | -3300.43239 | 0.33608 | -3300.53761 |         |         |
| $[(\eta_{04,06}^2-SBT)Ga(\eta_{03\sim05}^3-SBT)]^{3+} - 2*SBT$     | 0.00253 | -1924.35747 | 0.02968 | -1924.33031 | -1092.0 | -956.4  |
| $[(\eta_{04,06}^2-SBT)Ga(\eta_{04\sim06}^3-SBT)]^{3+}$             | 0.44247 | -3300.44435 | 0.34039 | -3300.54643 |         |         |
| $[(\eta_{04,06}^2-SBT)Ga(\eta_{04\sim06}^3-SBT)]^{3+} - 2*SBT$     | 0.00371 | -1924.36942 | 0.03399 | -1924.33914 | -1123.4 | -979.6  |
| $[(\eta_{02\sim05}^4-SBT)Ga(\eta_{04}^1-SBT)]^{3+}$                | 0.44160 | -3300.41365 | 0.34096 | -3300.51429 |         |         |
| $[(\eta_{02\sim05}^4-SBT)Ga(\eta_{04}^1-SBT)]^{3+} - 2*SBT$        | 0.00283 | -1924.33872 | 0.03456 | -1924.30699 | -1042.8 | -895.2  |
| $[(\eta_{03\sim05}^3-SBT)Ga(\eta_{02,03}^2-SBT)]^{3+}$             | 0.44098 | -3300.43482 | 0.33773 | -3300.53807 |         |         |
| $[(\eta_{03\sim05}^3-SBT)Ga(\eta_{02,03}^2-SBT)]^{3+} - 2*SBT$     | 0.00221 | -1924.35989 | 0.03133 | -1924.33077 | -1098.4 | -957.6  |
| $[Ga(\eta_{02\sim04}^3-SBT)_2]^{3+}$                               | 0.44190 | -3300.49148 | 0.34158 | -3300.59179 |         |         |
| $[Ga(\eta_{02\sim04}^3-SBT)_2]^{3+} - 2*SBT$                       | 0.00313 | -1924.41655 | 0.03518 | -1924.38449 | -1247.2 | -1098.7 |
| $[(\eta_{02\sim04}^3-SBT) Ga(\eta_{03\sim05}^3-SBT)]^{3+}$         | 0.44213 | -3300.47831 | 0.34202 | -3300.57841 |         |         |
| $[(\eta_{02\sim04}^3-SBT) Ga(\eta_{03\sim05}^3-SBT)]^{3+} - 2*SBT$ | 0.00336 | -1924.40338 | 0.03562 | -1924.37112 | -1212.6 | -1063.6 |
| $[(\eta_{02\sim04}^3-SBT)Ga(\eta_{04\sim06}^3-SBT)]^{3+}$          | 0.44285 | -3300.48157 | 0.34272 | -3300.58170 |         |         |
| $[(\eta_{02\sim04}^3-SBT)Ga(\eta_{04\sim06}^3-SBT)]^{3+} - 2*SBT$  | 0.00408 | -1924.40664 | 0.03632 | -1924.37440 | -1221.2 | -1072.2 |
| $[Ga(\eta_{03\sim05}^3-SBT)_2]^{3+}$                               | 0.44160 | -3300.47326 | 0.34008 | -3300.57478 |         |         |
| $[Ga(\eta_{03\sim05}^3-SBT)_2]^{3+} - 2*SBT$                       | 0.00284 | -1924.39833 | 0.03368 | -1924.36748 | -1199.3 | -1054.0 |
| $[(\eta_{03\sim05}^3-SBT)Ga(\eta_{04\sim06}^3-SBT)]^{3+}$          | 0.44310 | -3300.46997 | 0.34479 | -3300.56828 |         |         |
| $[(\eta_{03\sim05}^3-SBT)Ga(\eta_{04\sim06}^3-SBT)]^{3+} - 2*SBT$  | 0.00433 | -1924.39504 | 0.03840 | -1924.36098 | -1190.7 | -1036.9 |
| $[Ga(\eta_{04\sim06}^3-SBT)_2]^{3+}$                               | 0.44221 | -3300.47227 | 0.34198 | -3300.57250 |         |         |
| $[Ga(\eta_{04\sim06}^3-SBT)_2]^{3+} - 2*SBT$                       | 0.00345 | -1924.39734 | 0.03558 | -1924.36521 | -1196.7 | -1048.0 |

**Table S4.** Zero-point energies (*ZPE*, hartree), thermal correction to Gibbs free energy (*G*<sub>0</sub>, hartree), total energies (*E*<sub>c</sub>, hartree) corrected by *ZPE*, sum of electronic and thermal free energies (*G*<sub>c</sub>, hartree) with *ZPE* and thermal corrections, and relative energies (*E*<sub>r</sub>, kJ mol<sup>-1</sup>) and relative Gibbs free energies (*G*<sub>r</sub>, kJ mol<sup>-1</sup>) relative to Ga<sup>3+</sup>, SBT and OTf<sup>-</sup> for [Ga(OTf)<sub>n</sub>(SBT)<sub>m</sub>]<sup>3-n</sup> (*n* = 1,2; *m* = 1, 2) at M06/6-311++G(d,p) level in sorbitol solution.

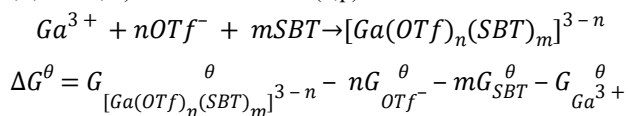

| Species                                                                                                                                                                      | <i>ZPE</i> | <i>E</i> <sub>c</sub> | <i>G</i> <sub>0</sub> | <i>G</i> <sub>c</sub> | <i>E</i> <sub>r</sub> | <i>G</i> <sub>r</sub> |
|------------------------------------------------------------------------------------------------------------------------------------------------------------------------------|------------|-----------------------|-----------------------|-----------------------|-----------------------|-----------------------|
| SBT                                                                                                                                                                          | 0.21938    | -688.03746            | 0.15320               | -688.10365            |                       |                       |
| OTf <sup>-</sup>                                                                                                                                                             | 0.02747    | -961.53419            | -0.02407              | -961.58573            |                       |                       |
| Ga <sup>3+</sup>                                                                                                                                                             | 0.00000    | -1923.94153           | -0.02450              | -1923.96603           | 0.0                   | 0.0                   |
| [( <sup>1</sup> η <sub>0</sub> -OTf)Ga( <sup>4</sup> η <sub>02~05</sub> -SBT)] <sup>2+</sup>                                                                                 | 0.25068    | -3573.93642           | 0.16100               | -3574.02610           |                       |                       |
| [( <sup>1</sup> η <sub>0</sub> -OTf)Ga( <sup>4</sup> η <sub>02~05</sub> -SBT)] <sup>2+</sup> - SBT - OTf <sup>-</sup>                                                        | 0.00382    | -1924.36477           | 0.03187               | -1924.33672           | -1111.2               | -973.2                |
| [( <sup>1</sup> η <sub>0</sub> -OTf)Ga( <sup>4</sup> η <sub>03~06</sub> -SBT)] <sup>2+</sup>                                                                                 | 0.25216    | -3573.92595           | 0.16530               | -3574.01282           |                       |                       |
| [( <sup>1</sup> η <sub>0</sub> -OTf)Ga( <sup>4</sup> η <sub>03~06</sub> -SBT)] <sup>2+</sup> - SBT - OTf <sup>-</sup>                                                        | 0.00531    | -1924.35429           | 0.03617               | -1924.32343           | -1083.7               | -938.4                |
| [( <sup>2</sup> η <sub>0,0</sub> -OTf)Ga( <sup>4</sup> η <sub>02~05</sub> -SBT)] <sup>2+</sup>                                                                               | 0.25053    | -3573.95198           | 0.16252               | -3574.03999           |                       |                       |
| [( <sup>2</sup> η <sub>0,0</sub> -OTf)Ga( <sup>4</sup> η <sub>02~05</sub> -SBT)] <sup>2+</sup> - SBT - OTf <sup>-</sup>                                                      | 0.00367    | -1924.38033           | 0.03340               | -1924.35061           | -1152.1               | -1009.7               |
| [( <sup>2</sup> η <sub>0,0</sub> -OTf)Ga( <sup>4</sup> η <sub>03~06</sub> -SBT)] <sup>2+</sup>                                                                               | 0.25215    | -3573.93721           | 0.16476               | -3574.02460           |                       |                       |
| [( <sup>2</sup> η <sub>0,0</sub> -OTf)Ga( <sup>4</sup> η <sub>03~06</sub> -SBT)] <sup>2+</sup> - SBT - OTf <sup>-</sup>                                                      | 0.00530    | -1924.36556           | 0.03563               | -1924.33522           | -1113.3               | -969.3                |
| [( <sup>1</sup> η <sub>0</sub> -OTf)( <sup>2</sup> η <sub>02,04</sub> -SBT) <sup>3</sup> Ga( <sup>5</sup> η <sub>03~05</sub> -SBT)] <sup>2+</sup>                            | 0.47426    | -4262.06017           | 0.35705               | -4262.17737           |                       |                       |
| [( <sup>1</sup> η <sub>0</sub> -OTf)( <sup>2</sup> η <sub>02,04</sub> -SBT) <sup>3</sup> Ga( <sup>5</sup> η <sub>03~05</sub> -SBT)] <sup>2+</sup> - 2*SBT - OTf <sup>-</sup> | 0.00802    | -1924.45105           | 0.07473               | -1924.38434           | -1337.7               | -1098.3               |
| [( <sup>2</sup> η <sub>0,0</sub> -OTf)( <sup>1</sup> η <sub>04</sub> -SBT) <sup>2</sup> Ga( <sup>6</sup> η <sub>04,06</sub> -SBT)] <sup>2+</sup>                             | 0.47400    | -4262.00372           | 0.35546               | -4262.12226           |                       |                       |
| [( <sup>2</sup> η <sub>0,0</sub> -OTf)( <sup>1</sup> η <sub>04</sub> -SBT) <sup>2</sup> Ga( <sup>6</sup> η <sub>04,06</sub> -SBT)] <sup>2+</sup> - 2*SBT - OTf <sup>-</sup>  | 0.00776    | -1924.39460           | 0.07314               | -1924.32923           | -1189.5               | -953.6                |
| [( <sup>1</sup> η <sub>0</sub> -OTf) <sub>2</sub> Ga( <sup>2</sup> η <sub>02,04</sub> -SBT)] <sup>+</sup>                                                                    | 0.28145    | -4535.54195           | 0.17268               | -4535.65072           |                       |                       |
| [( <sup>1</sup> η <sub>0</sub> -OTf) <sub>2</sub> Ga( <sup>2</sup> η <sub>02,04</sub> -SBT)] <sup>+</sup> - SBT - 2*OTf <sup>-</sup>                                         | 0.00712    | -1924.43610           | 0.06762               | -1924.37560           | -1298.5               | -1075.3               |
| [( <sup>2</sup> η <sub>0,0</sub> -OTf) <sub>2</sub> Ga( <sup>2</sup> η <sub>02,04</sub> -SBT)] <sup>+</sup>                                                                  | 0.28213    | -4535.54119           | 0.17453               | -4535.64879           |                       |                       |
| [( <sup>2</sup> η <sub>0,0</sub> -OTf) <sub>2</sub> Ga( <sup>2</sup> η <sub>02,04</sub> -SBT)] <sup>+</sup> - SBT - 2*OTf <sup>-</sup>                                       | 0.00780    | -1924.43535           | 0.06948               | -1924.37367           | -1296.5               | -1070.3               |
| [( <sup>1</sup> η <sub>0</sub> -OTf)( <sup>2</sup> η <sub>0,0</sub> -OTf)Ga( <sup>3</sup> η <sub>03~05</sub> -SBT)] <sup>+</sup>                                             | 0.28093    | -4535.55419           | 0.16835               | -4535.66677           |                       |                       |
| [( <sup>1</sup> η <sub>0</sub> -OTf)( <sup>2</sup> η <sub>0,0</sub> -OTf)Ga( <sup>3</sup> η <sub>03~05</sub> -SBT)] <sup>+</sup> - SBT - 2*OTf <sup>-</sup>                  | 0.00660    | -1924.44835           | 0.06329               | -1924.39165           | -1330.6               | -1117.5               |
| [( <sup>1</sup> η <sub>0</sub> -OTf) <sub>2</sub> Ga( <sup>4</sup> η <sub>02~05</sub> -SBT)] <sup>+</sup>                                                                    | 0.28186    | -4535.55152           | 0.17454               | -4535.65884           |                       |                       |
| [( <sup>1</sup> η <sub>0</sub> -OTf) <sub>2</sub> Ga( <sup>4</sup> η <sub>02~05</sub> -SBT)] <sup>+</sup> - SBT - 2*OTf <sup>-</sup>                                         | 0.00753    | -1924.44567           | 0.06949               | -1924.38372           | -1323.6               | -1096.6               |
| [( <sup>1</sup> η <sub>0</sub> -OTf) <sub>2</sub> Ga( <sup>4</sup> η <sub>03~06</sub> -SBT)] <sup>+</sup>                                                                    | 0.28239    | -4535.53989           | 0.17483               | -4535.64744           |                       |                       |
| [( <sup>1</sup> η <sub>0</sub> -OTf) <sub>2</sub> Ga( <sup>4</sup> η <sub>03~06</sub> -SBT)] <sup>+</sup> - SBT - 2*OTf <sup>-</sup>                                         | 0.00806    | -1924.43405           | 0.06978               | -1924.37233           | -1293.1               | -1066.7               |



**Table S5.** In THF solution with both SBT and Ga(OTf)<sub>3</sub> compounds, the species was characterized by ESI-MS spectra.<sup>a</sup>

| Species                                                                                                            | m/z    |
|--------------------------------------------------------------------------------------------------------------------|--------|
| [Ga(SBT)] <sup>3+</sup>                                                                                            | 83.67  |
| [Ga(OTf)] <sup>2+</sup>                                                                                            | 109.94 |
| [Ga(SBT) <sub>2</sub> ] <sup>3+</sup>                                                                              | 144.36 |
| [Ga(OTf)(SBT)] <sup>2+</sup>                                                                                       | 199.98 |
| [Ga(OTf)(SBT) <sub>2</sub> ] <sup>2+</sup>                                                                         | 291.02 |
| [[Ga(OTf) <sub>2</sub> (SBT)] <sup>+</sup> – F <sup>-</sup> ] <sup>2+</sup>                                        | 264.95 |
| [[Ga(OTf) <sub>2</sub> (SBT)] <sup>+</sup> – 2F <sup>-</sup> ] <sup>3+</sup>                                       | 170.30 |
| [[Ga(OTf) <sub>2</sub> (SBT)] <sup>+</sup> – 3F <sup>-</sup> ] <sup>4+</sup>                                       | 122.98 |
| [[Ga(SBT)] <sup>3+</sup> – OH <sup>-</sup> ] <sup>4+</sup>                                                         | 58.50  |
| [[Ga(OTf) <sub>3</sub> ] – F <sup>-</sup> ] <sup>+</sup>                                                           | 496.78 |
| [[Ga(OTf)(SBT) <sub>2</sub> ] <sup>2+</sup> – OH <sup>-</sup> ] <sup>3+</sup>                                      | 188.34 |
| [[Ga(OTf)(SBT)] <sup>2+</sup> – OH <sup>-</sup> ] <sup>3+</sup>                                                    | 127.65 |
| [[Ga(OTf)(SBT)] <sup>2+</sup> – CF <sub>3</sub> <sup>+</sup> – OH <sup>-</sup> ] <sup>2+</sup>                     | 248.02 |
| [[Ga(SBT) <sub>2</sub> ] <sup>3+</sup> – H <sup>+</sup> – OH <sup>-</sup> ] <sup>3+</sup>                          | 138.36 |
| [[Ga(OTf) <sub>2</sub> (SBT)] <sup>+</sup> – 6F <sup>-</sup> – H <sup>+</sup> ] <sup>6+</sup>                      | 72.32  |
| [[Ga(OTf)(SBT)] <sup>2+</sup> – F <sup>-</sup> ] <sup>3+</sup>                                                     | 126.99 |
| [[Ga(OTf)(SBT)] <sup>2+</sup> – OH <sup>-</sup> ] <sup>3+</sup>                                                    | 127.65 |
| [(OTf)] <sup>-</sup> – F <sup>-</sup> ]                                                                            | 129.95 |
| [[Ga(OTf)(SBT) <sub>2</sub> ] <sup>2+</sup> – 4OH <sup>-</sup> – F <sup>-</sup> ] <sup>5+</sup>                    | 70.72  |
| [[Ga(OTf)(SBT) <sub>2</sub> ] <sup>2+</sup> – 5OH <sup>-</sup> ] <sup>7+</sup>                                     | 71.00  |
| [[Ga(OTf)(SBT) <sub>2</sub> ] <sup>2+</sup> – 2H <sup>+</sup> – 6OH <sup>-</sup> – 2F <sup>-</sup> ] <sup>8+</sup> | 55.00  |

<sup>a</sup> ESI-MS (X500R QTOF, AB Sciex LP) spectra. The operating parameters were as follows: ionization voltage, 4.5 kV; interface temperature, 500 °C; nebulizer gas flow, 55 psi (N<sub>2</sub>); detector voltage, 2.225 kV; continuum mode.

**Table S6.** Some typical species from experimental observation of ESI-MS spectra and the density functional theory (DFT) calculations at the M06/6-311++g(d,p), aug-cc-pvtz level.

| ESI-MS                                     |        | M06/6-311++g(d,p), aug-cc-pvtz                                                       |                                                               |
|--------------------------------------------|--------|--------------------------------------------------------------------------------------|---------------------------------------------------------------|
| Species                                    | m/z    | Geometric Structure                                                                  | Relative Gibbs Free Energies ( $G_r$ , kJ mol <sup>-1</sup> ) |
| [Ga(SBT)] <sup>3+</sup>                    | 83.67  | 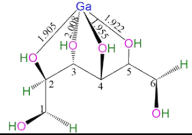    | -729.6                                                        |
| [Ga(OTf)] <sup>2+</sup>                    | 109.94 |     | -527.9                                                        |
| [Ga(SBT) <sub>2</sub> ] <sup>3+</sup>      | 144.36 |     | -1098.7                                                       |
| [Ga(OTf)(SBT)] <sup>2+</sup>               | 199.98 |    | -1009.7                                                       |
| [Ga(OTf)(SBT) <sub>2</sub> ] <sup>2+</sup> | 291.02 |  | -1098.3                                                       |
| Ga(OTf) <sub>3</sub>                       |        |   | -1059.9                                                       |
| [Ga(OTf) <sub>2</sub> (SBT)] <sup>+</sup>  |        |   | -1117.5                                                       |
